# Supplementary material for: WISER Survivor Trial: Combined Effect of Exercise and Weight Loss Interventions on Adiponectin and Leptin Levels in Breast Cancer Survivors with Overweight or Obesity
Source: MDPI journal article supplement (doi:10.3390/nu15153453), 2023-08-04
Supplement: s1 [file s1]

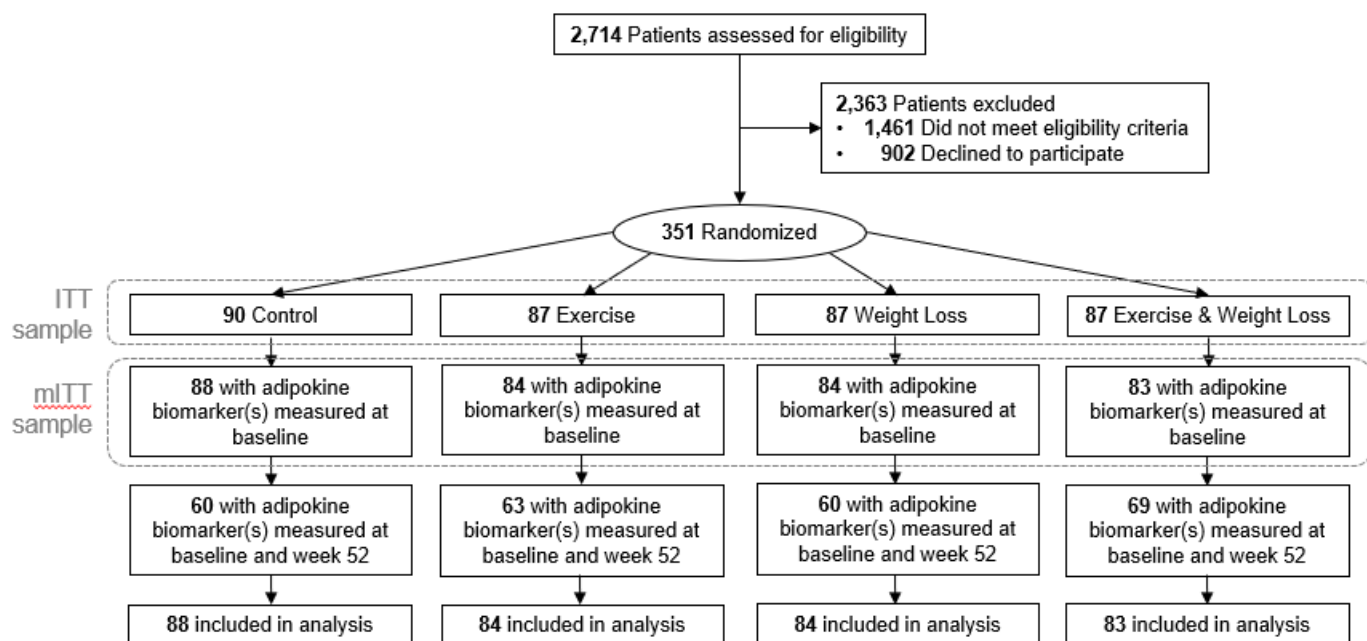

**Figure S1.** Flow of participants by randomized group and definition of the intention to treat (ITT) and modified intention-to-treat (mITT) populations.

**Table S1.** Baseline characteristics between the intention-to-treat (ITT) and modified-intention-to-treat (mITT) populations.

| Characteristic                     | ITT<br>(n=351) | mITT<br>(n=339) |
|------------------------------------|----------------|-----------------|
| Age, y                             | 59.4 (8.7)     | 59.4 (8.7)      |
| Race, n (%)                        |                |                 |
| White                              | 218<br>(62.1%) | 215 (63.4%)     |
| Black                              | 122<br>(34.8%) | 113 (33.3%)     |
| Other                              | 11 (3.9%)      | 11 (3.3%)       |
| Body mass index, kg/m <sup>2</sup> | 34.0 (5.9)     | 34.0 (5.9)      |
| 25.0–29.9 kg/m <sup>2</sup>        | 108<br>(30.8%) | 104 (30.7%)     |
| 30.0–34.9 kg/m <sup>2</sup>        | 102<br>(29.1%) | 98 (28.9%)      |
| ≥35.0 kg/m <sup>2</sup>            | 141<br>(40.1%) | 137 (40.4%)     |
| Cancer stage, n (%)                |                |                 |
| Ductal carcinoma in situ           | 24 (6.8%)      | 24 (7.1%)       |
| I                                  | 74 (21.1%)     | 73 (21.5%)      |
| II                                 | 104<br>(29.6%) | 99 (29.2%)      |
| III                                | 70 (19.4%)     | 68 (20.1%)      |
| Unknown                            | 79 (23.1%)     | 75 (22.1%)      |
| No. of nodes removed, n            | 12.5 (9.2)     | 12.5 (9.2)      |
| Cancer treatments, n (%)           |                |                 |
| Chemotherapy                       | 289<br>(82.3%) | 277 (81.7%)     |
| Radiotherapy                       | 288<br>(82.1%) | 278 (82.0%)     |
| Tamoxifen                          | 36 (10.3%)     | 35 (10.3%)      |
| Aromatase inhibitor                | 102<br>(29.1%) | 101 (29.8%)     |
| Time since cancer diagnosis, mo.   | 92.0 (63.4)    | 92.7 (63.7)     |

Values are mean (standard deviation) or n (%).

**Table S2.** Correlation of log-transformed change in adipokine biomarkers by change in body composition and biomarkers of insulin resistance, inflammation, and sex steroid hormones.

|                                 | $\Delta$ Leptin    | $\Delta$ Adiponectin | $\Delta$ Adiponectin:<br>Leptin Ratio |
|---------------------------------|--------------------|----------------------|---------------------------------------|
| $\Delta$ Body weight            | $r=0.65; P<0.001$  | $r=-0.21; P=0.001$   | $r=-0.53; P<0.001$                    |
| $\Delta$ Fat mass               | $r=0.63; P<0.001$  | $r=-0.19; P=0.004$   | $r=-0.50; P<0.001$                    |
| $\Delta$ Visceral fat area      | $r=0.35; P<0.001$  | $r=-0.06; P=0.33$    | $r=-0.24; P<0.001$                    |
| $\Delta$ Subcutaneous fat area  | $r=0.48; P<0.001$  | $r=-0.15; P=0.020$   | $r=-0.44; P<0.001$                    |
| $\Delta$ Lean mass              | $r=0.39; P<0.001$  | $r=-0.23; P<0.001$   | $r=-0.34; P<0.001$                    |
| $\Delta$ Appendicular lean mass | $r=0.32; P<0.001$  | $r=-0.18; P=0.006$   | $r=-0.25; P<0.001$                    |
| $\Delta$ Insulin                | $r=0.04; P=0.53$   | $r=-0.08; P=0.25$    | $r=0.04; P=0.56$                      |
| $\Delta$ Glucose                | $r=0.15; P=0.020$  | $r=-0.22; P=0.001$   | $r=-0.18; P=0.006$                    |
| $\Delta$ C-peptide              | $r=0.51; P<0.001$  | $r=-0.19; P=0.004$   | $r=-0.40; P<0.001$                    |
| $\Delta$ C-reactive protein     | $r=0.26; P<0.001$  | $r=-0.20; P=0.003$   | $r=-0.24; P<0.001$                    |
| $\Delta$ Serum amyloid A        | $r=0.24; P<0.001$  | $r=-0.11; P=0.11$    | $r=-0.21; P=0.002$                    |
| $\Delta$ ICAM-1                 | $r=0.03; P=0.69$   | $r=-0.14; P=0.039$   | $r=-0.09; P=0.20$                     |
| $\Delta$ VCAM-1                 | $r=-0.08; P=0.22$  | $r=-0.05; P=0.50$    | $r=0.04; P=0.52$                      |
| $\Delta$ Estradiol              | $r=0.12; P=0.089$  | $r=0.03; P=0.61$     | $r=-0.04; P=0.58$                     |
| $\Delta$ SHBG                   | $r=-0.37; P<0.001$ | $r=0.27; P<0.001$    | $r=0.39; P<0.001$                     |
| $\Delta$ Testosterone           | $r=0.23; P=0.004$  | $r=-0.14; P=0.067$   | $r=-0.22; P=0.005$                    |

HOMA-IR, homeostatic model assessment of insulin resistance; ICAM-1, intercellular adhesion molecule 1; vascular cell adhesion molecule 1; SHBG, sex hormone binding globulin
